# Supplementary material
Source: PubMed Central journal article supplement (PMC5871868)

# Supplementary Figure 1

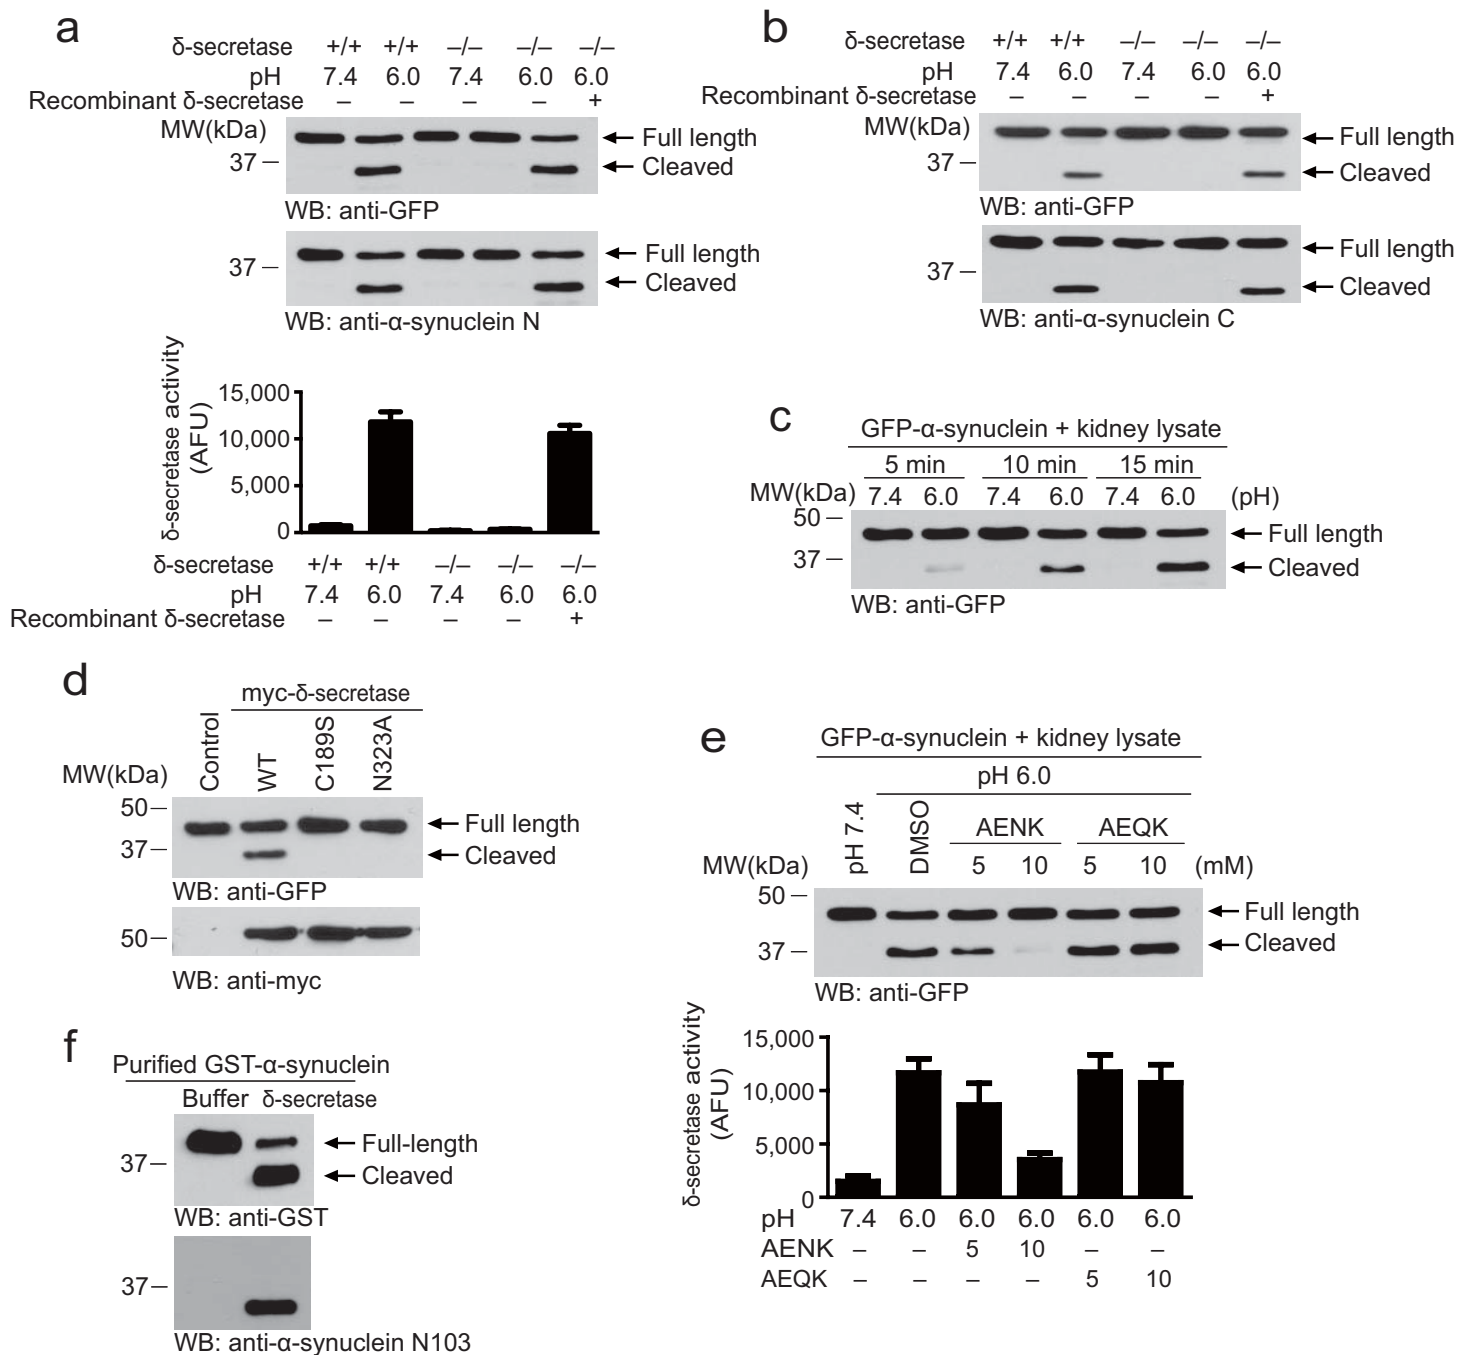

# Supplementary Figure 2

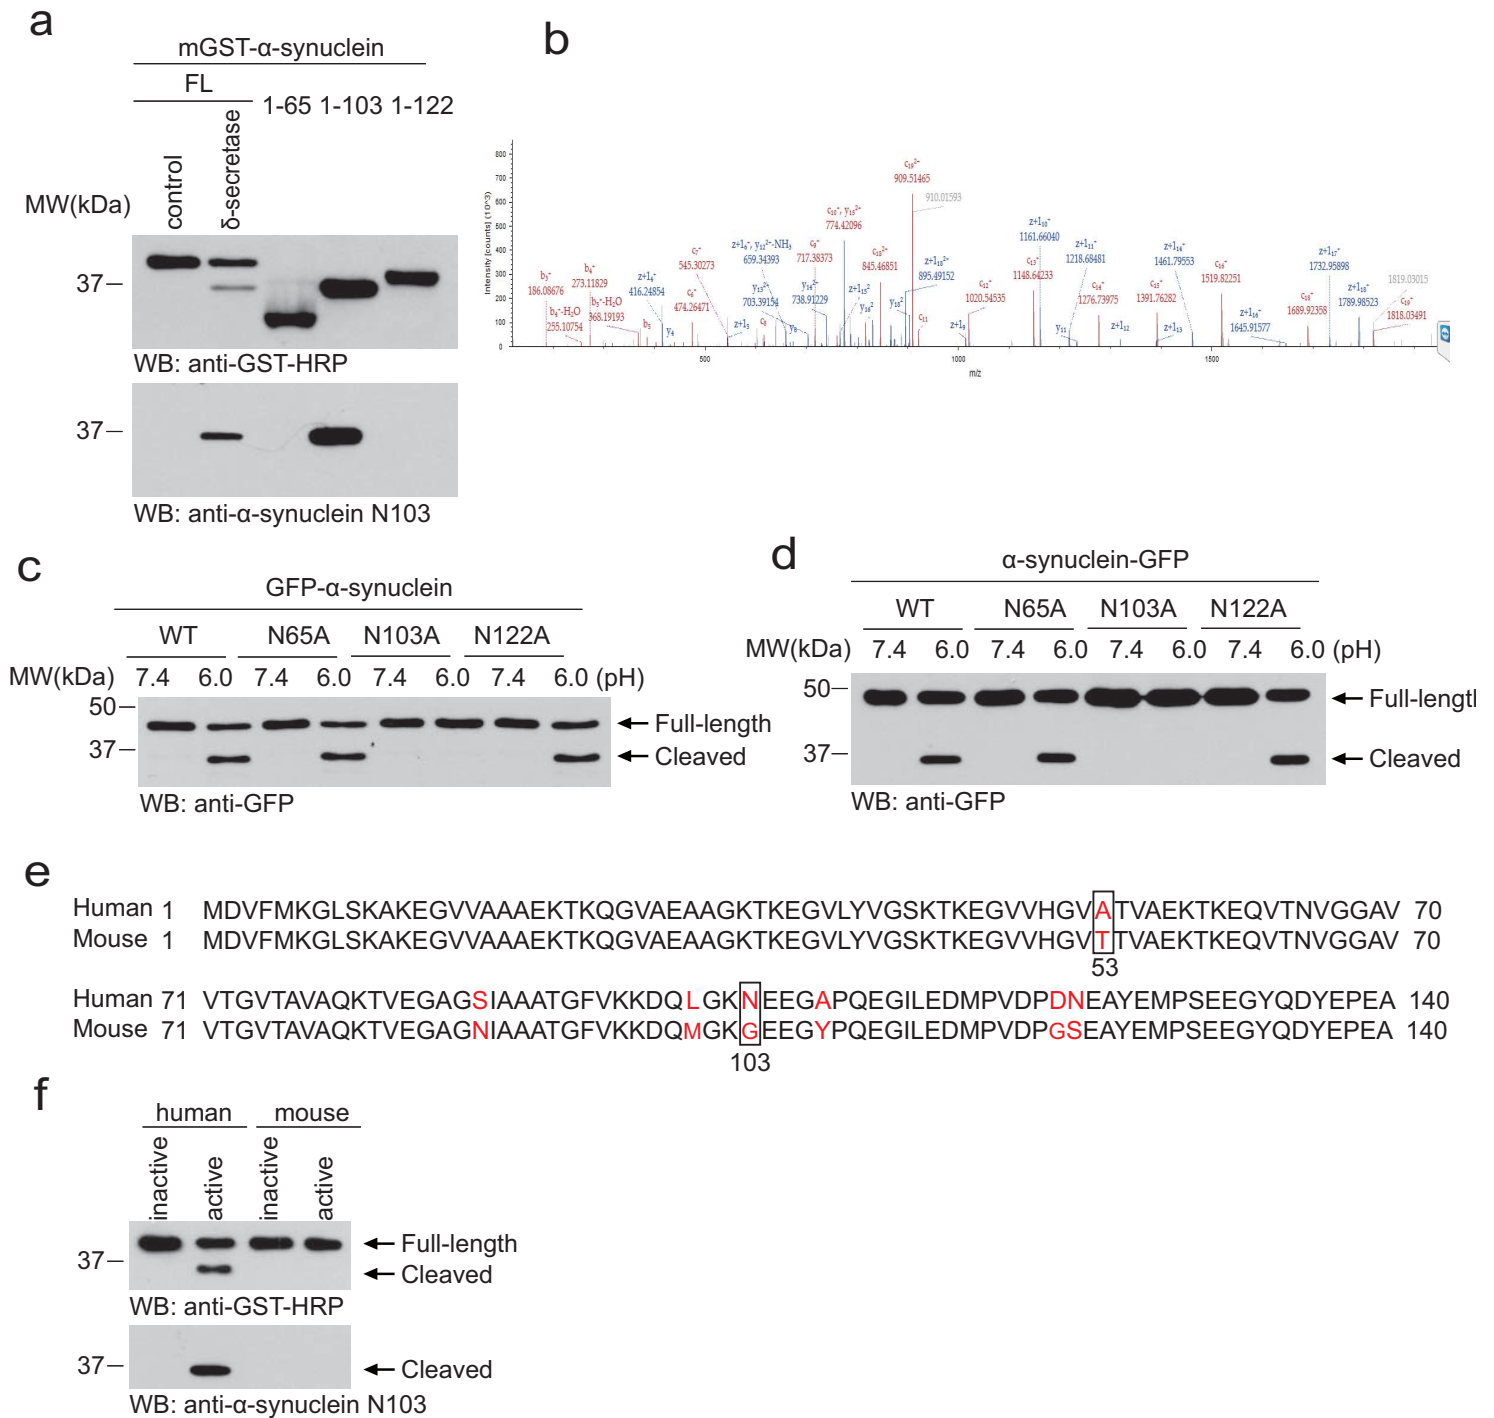

# Supplementary Figure 3

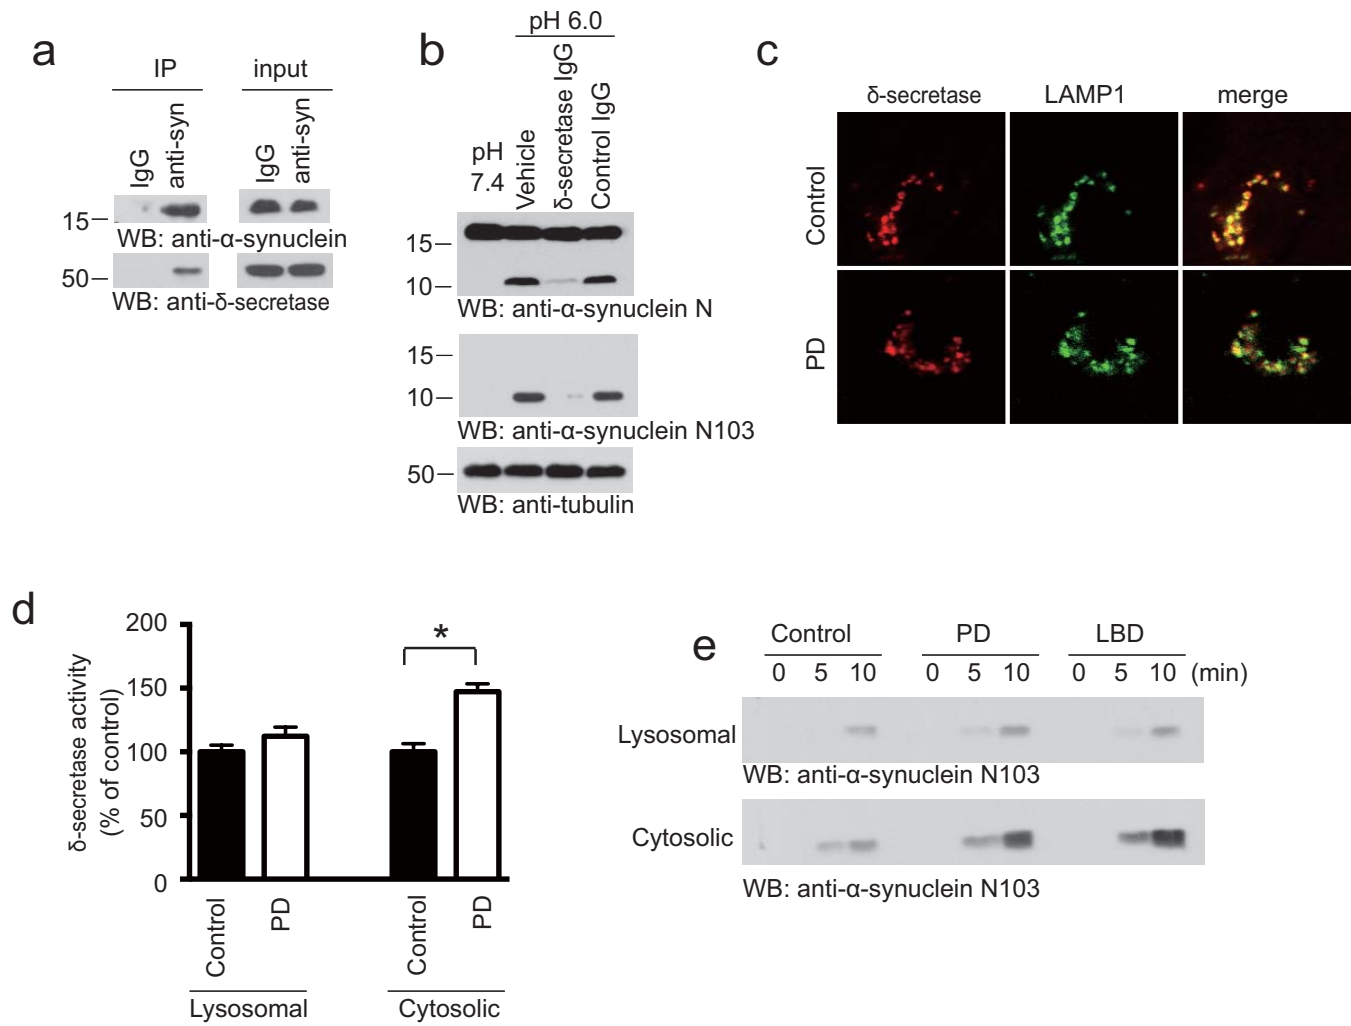

# Supplementary Figure 4

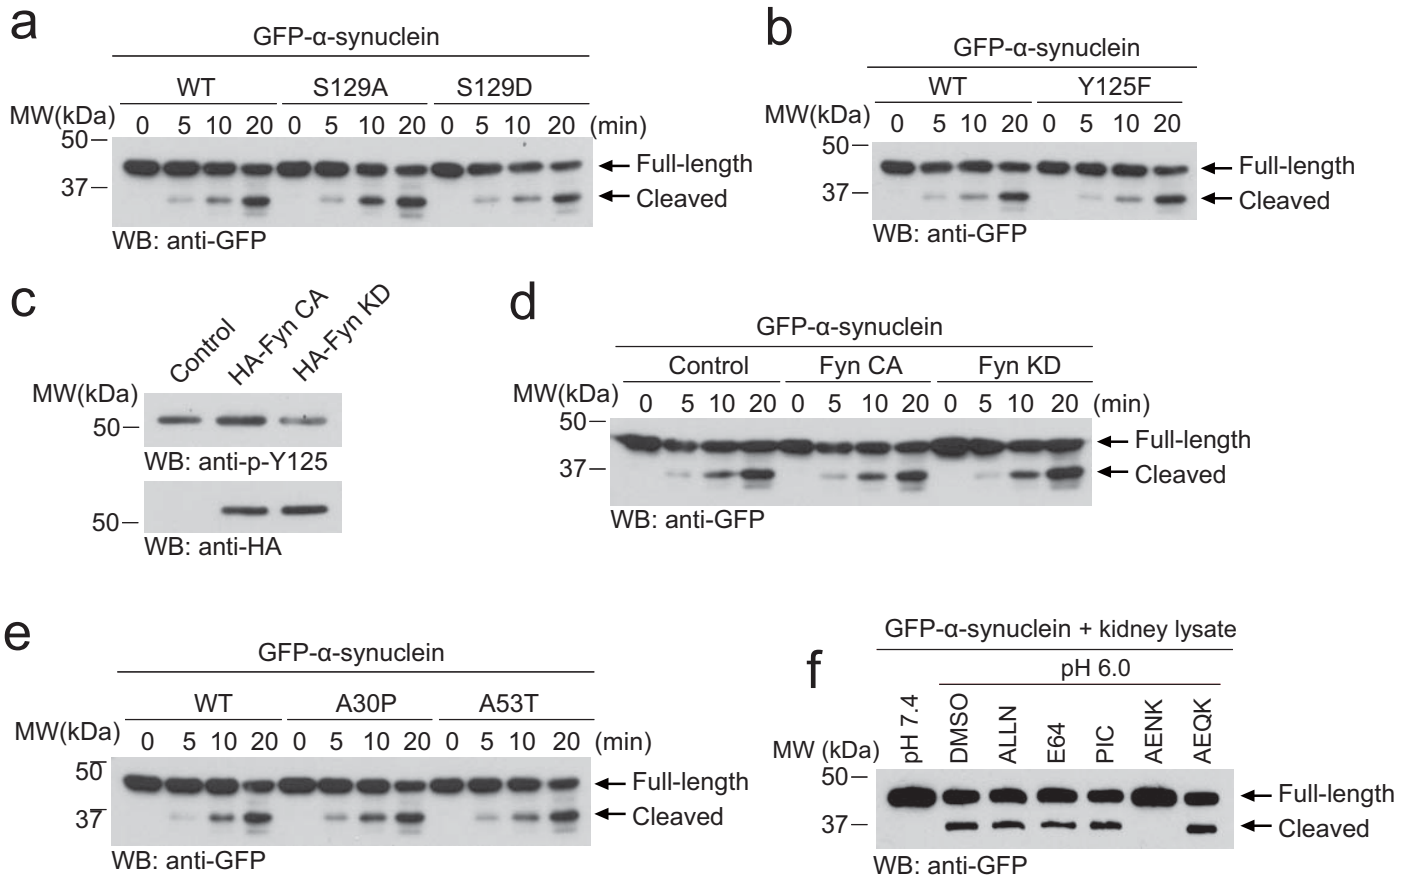

# Supplementary Figure 5

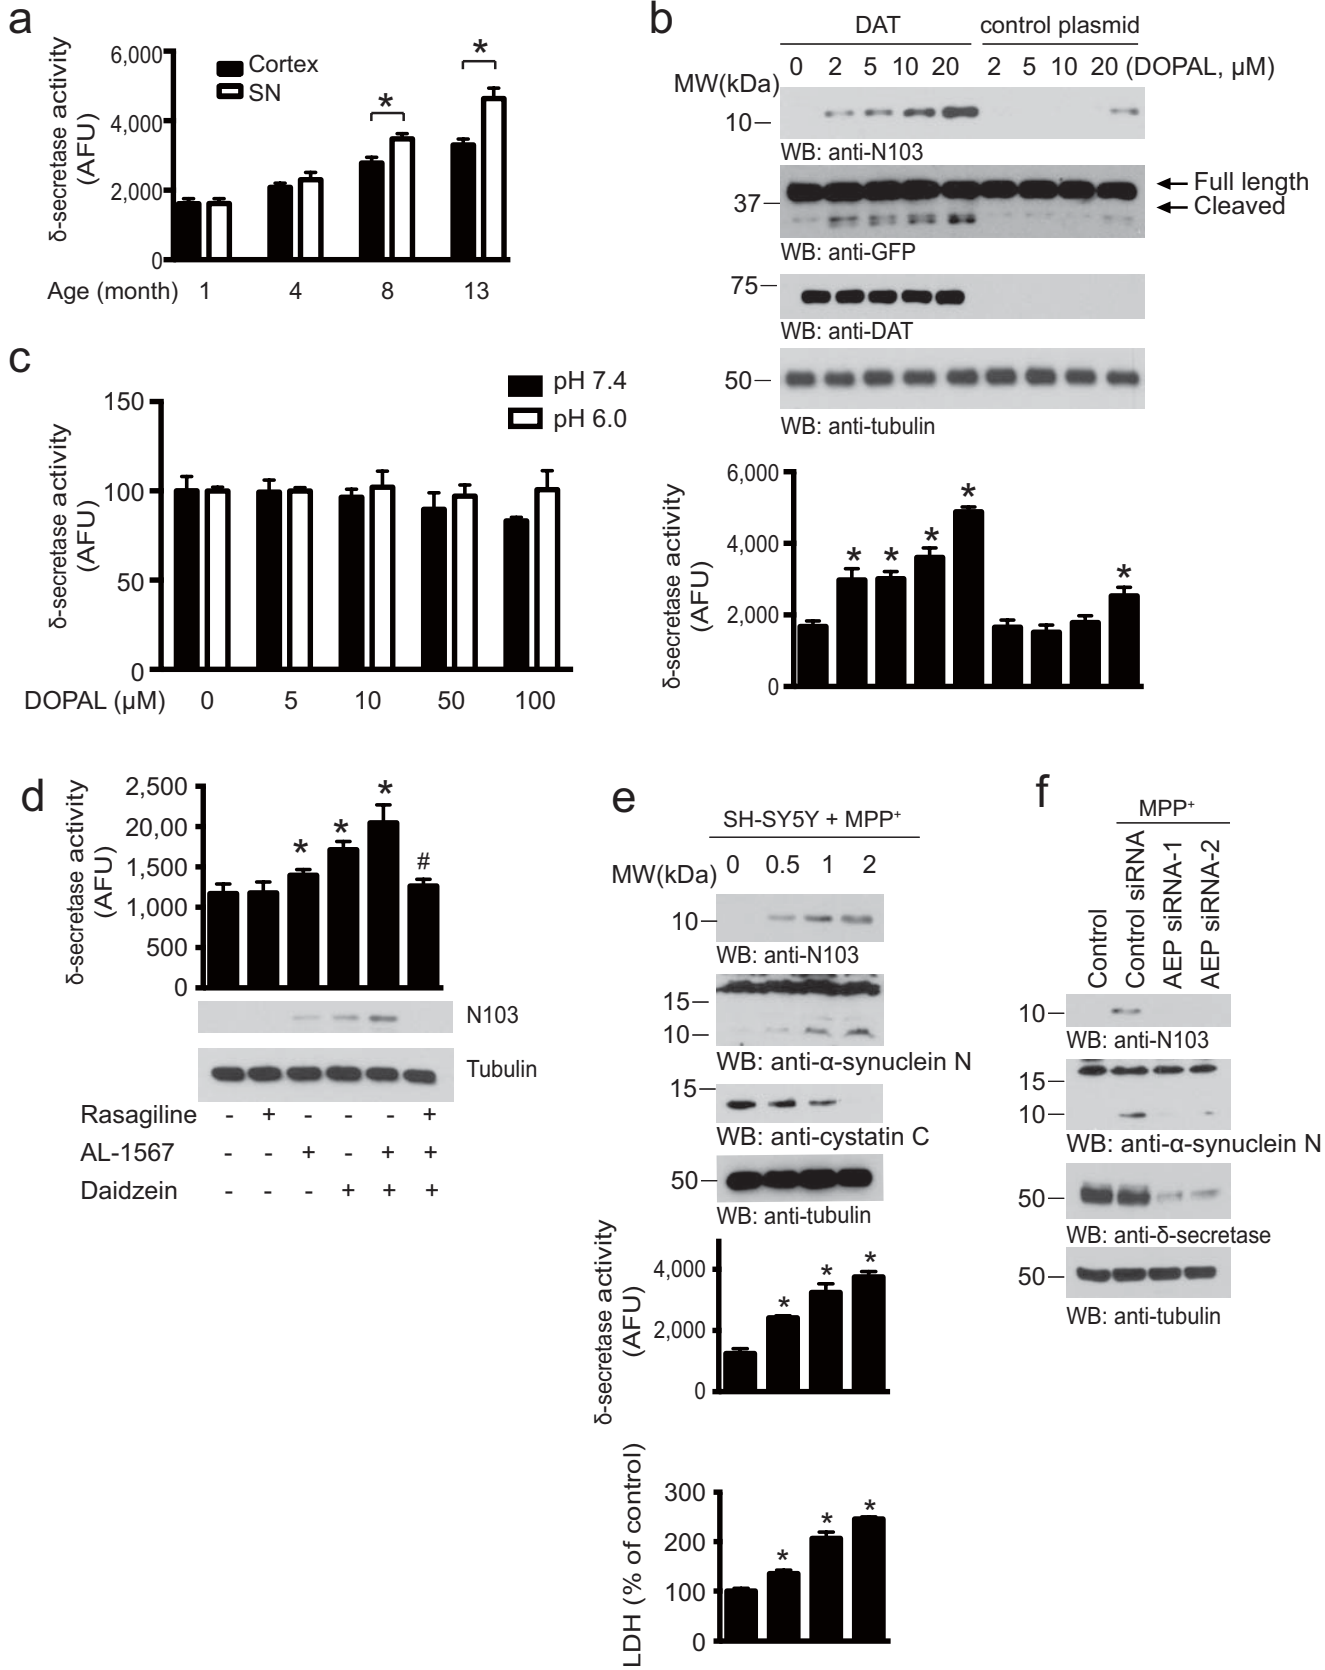

Supplementary Figure 6

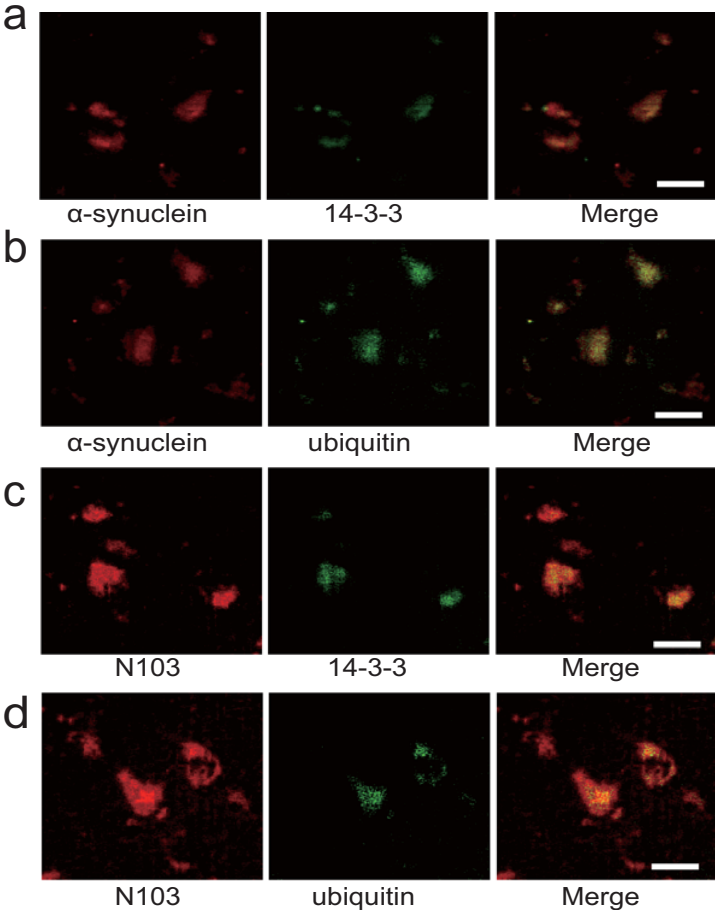

Supplement: NIHMS950467-supplement-Supplementary_Figures.pdf [file NIHMS950467-supplement-Supplementary_Figures.pdf]
