# Supplementary material
Source: PubMed Central journal article supplement (PMC5871868)
Supplement: NIHMS950467-supplement-Supplementary_information.pdf [file NIHMS950467-supplement-Supplementary_information.pdf]

**Asparagine Endopeptidase Cleaves  $\alpha$ -synuclein and Mediates its Pathologic Activities in  
Parkinson's Disease**

By

Zhentao Zhang, Seong Su Kang, Xia Liu, Zhaohui Zhang, Li He, P. Michael Iuvone, Duc M.  
Duong, Nicholas T. Seyfried, Matthew J Benskey, Fredric P. Manfredsson, Lingjing Jin, Yi E. Sun,  
Jian-zhi Wang and Keqiang Ye

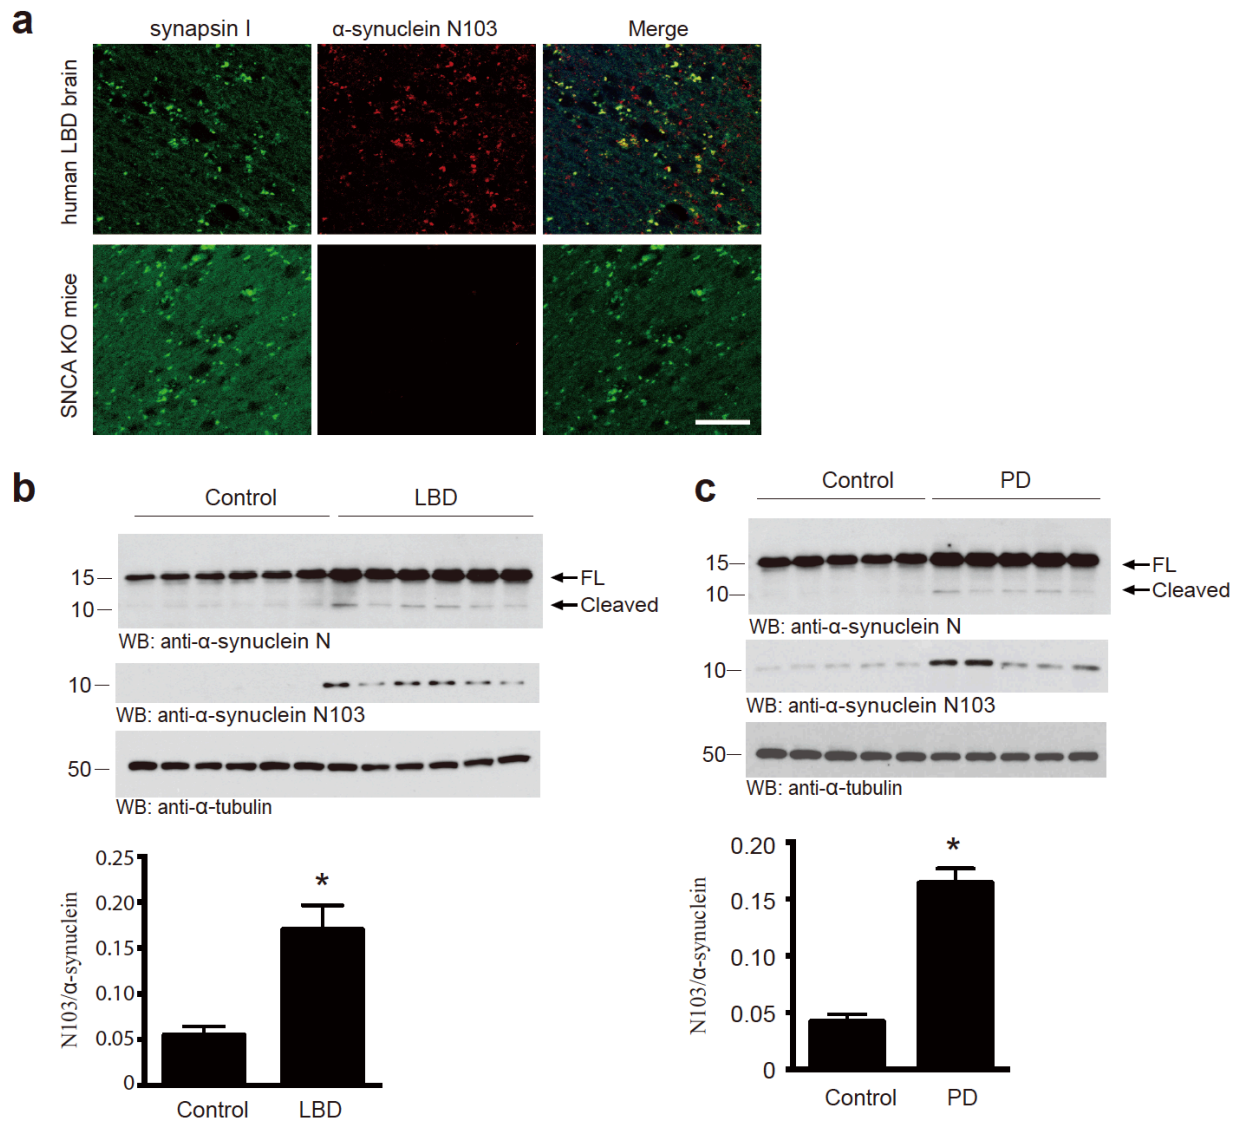

**Supplementary Figure 1.  $\alpha$ -synuclein is truncated in PD and LBD brain.** (a) Localization of  $\alpha$ -synuclein N103 fragments in synaptic structures. LBD brain sections were immunostained with anti- $\alpha$ -synuclein N103 (red) and presynaptic marker synapsin I (green). Scale bar, 20  $\mu$ m. Images are representative of 9 sections from three subjects. SNCA knockout mice brain was used as negative control. (b-c) Western blot showing the presence of  $\alpha$ -synuclein N103 fragment in brain lysates from human LBD cortex and PD SN tissues (mean  $\pm$  SEM;  $n = 6$ ,  $*P < 0.05$  compared with control, student's  $t$ -test). The shown blots are the representative figures of three independent experiments.

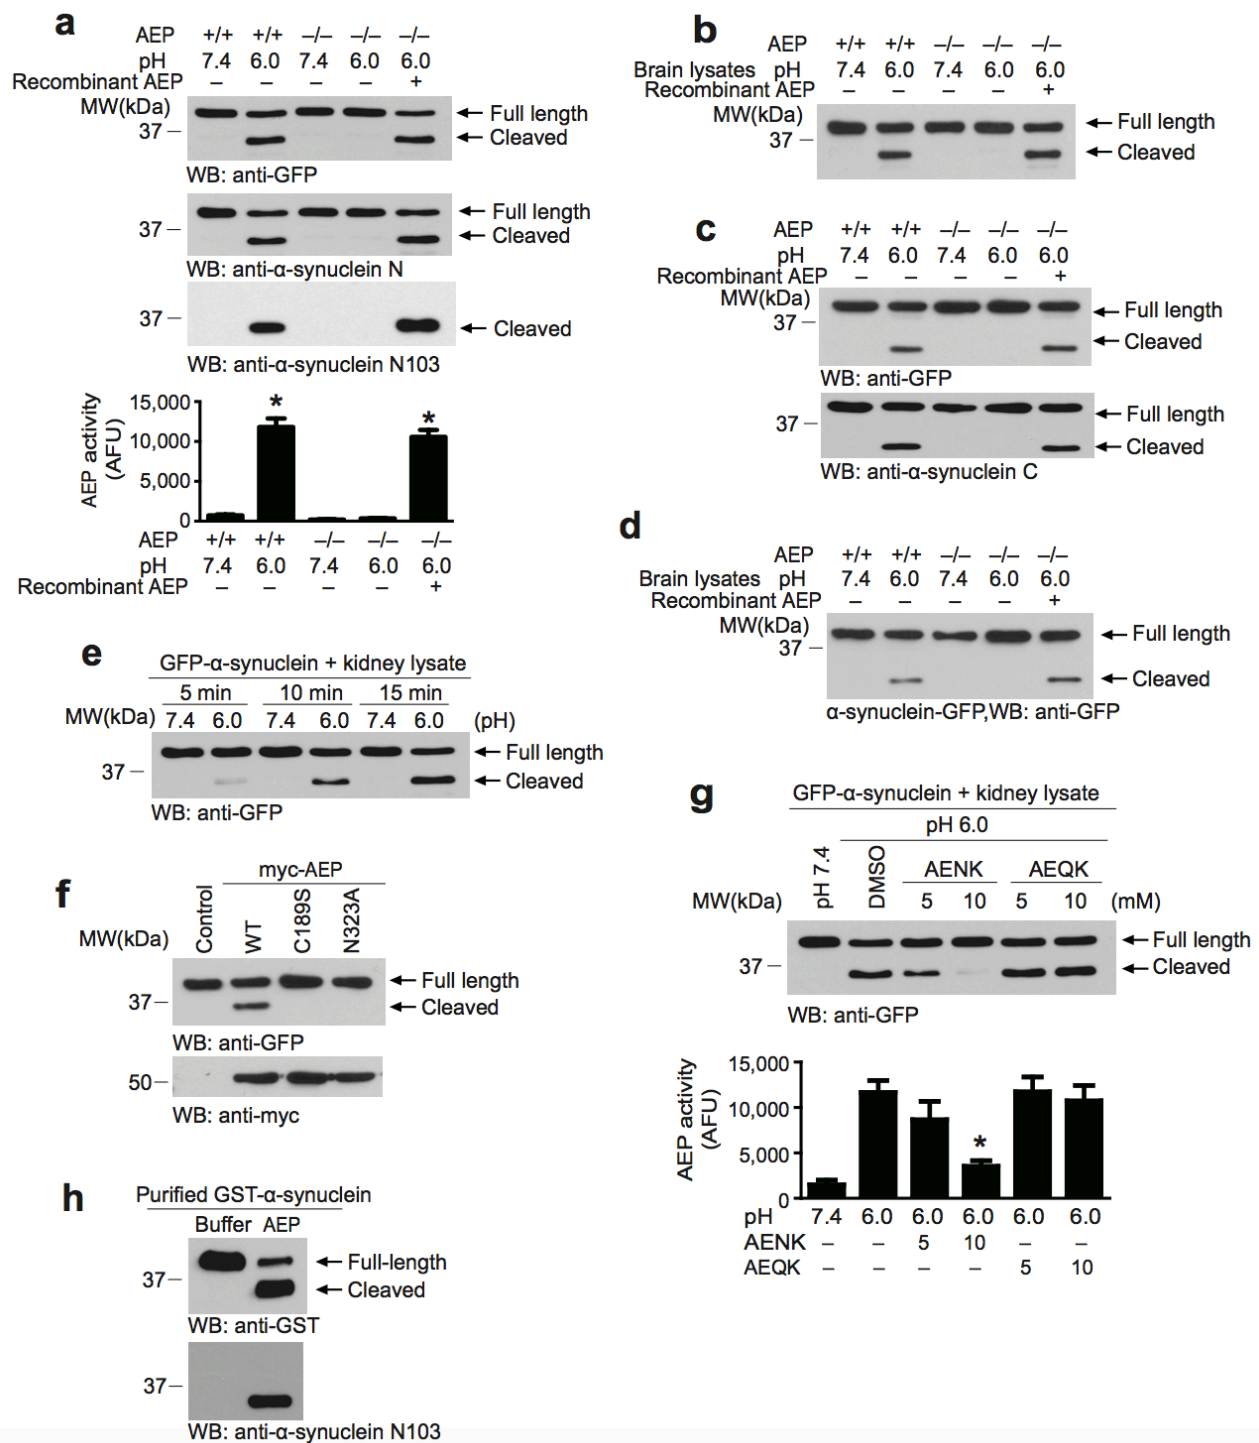

**Supplementary Figure 2.  $\alpha$ -synuclein is a substrate of AEP.** (a)  $\alpha$ -synuclein cleavage assay in kidney lysates. N-terminal GFP-tagged  $\alpha$ -synuclein was incubated with kidney lysates from WT or AEP knockout mice at pH 7.4 or pH 6.0 at 37°C for 15 min. Western blot shows that  $\alpha$ -synuclein was cleaved at pH 6.0 (upper panel) when AEP was activated (lower panel) (mean  $\pm$  SEM;  $n = 3$ ,  $*P < 0.05$  compared with pH 7.4 group, one-way ANOVA). (b)  $\alpha$ -synuclein cleavage assay in

brain lysates. N-terminal GFP-tagged  $\alpha$ -synuclein was incubated with brain lysates from WT or AEP knockout mice at pH 7.4 or pH 6.0 at 37°C for 15 min. **(c-d)** Processing of C-terminal GFP-tagged  $\alpha$ -synuclein in mouse kidney lysates **(c)** and brain lysates **(d)**. **(e)** Time-dependent cleavage of  $\alpha$ -synuclein by AEP. **(f)**  $\alpha$ -synuclein cleavage by wild-type and mutant AEP. **(g)** The proteolysis of  $\alpha$ -synuclein is blocked by AENK peptide, but not AEQK (upper panel). The effect of AENK on AEP was confirmed by enzymatic activity assay (bottom panel) (mean  $\pm$  SEM;  $n = 3$ ,  $*P < 0.05$  compared with wild-type group, one-way ANOVA). **(h)** Purified active recombinant AEP potently cleaves purified GST- $\alpha$ -synuclein recombinant protein. The AEP-generated  $\alpha$ -synuclein fragment was recognized by anti- $\alpha$ -synuclein N103 antibody. The shown blots are the representative figures of three independent experiments.

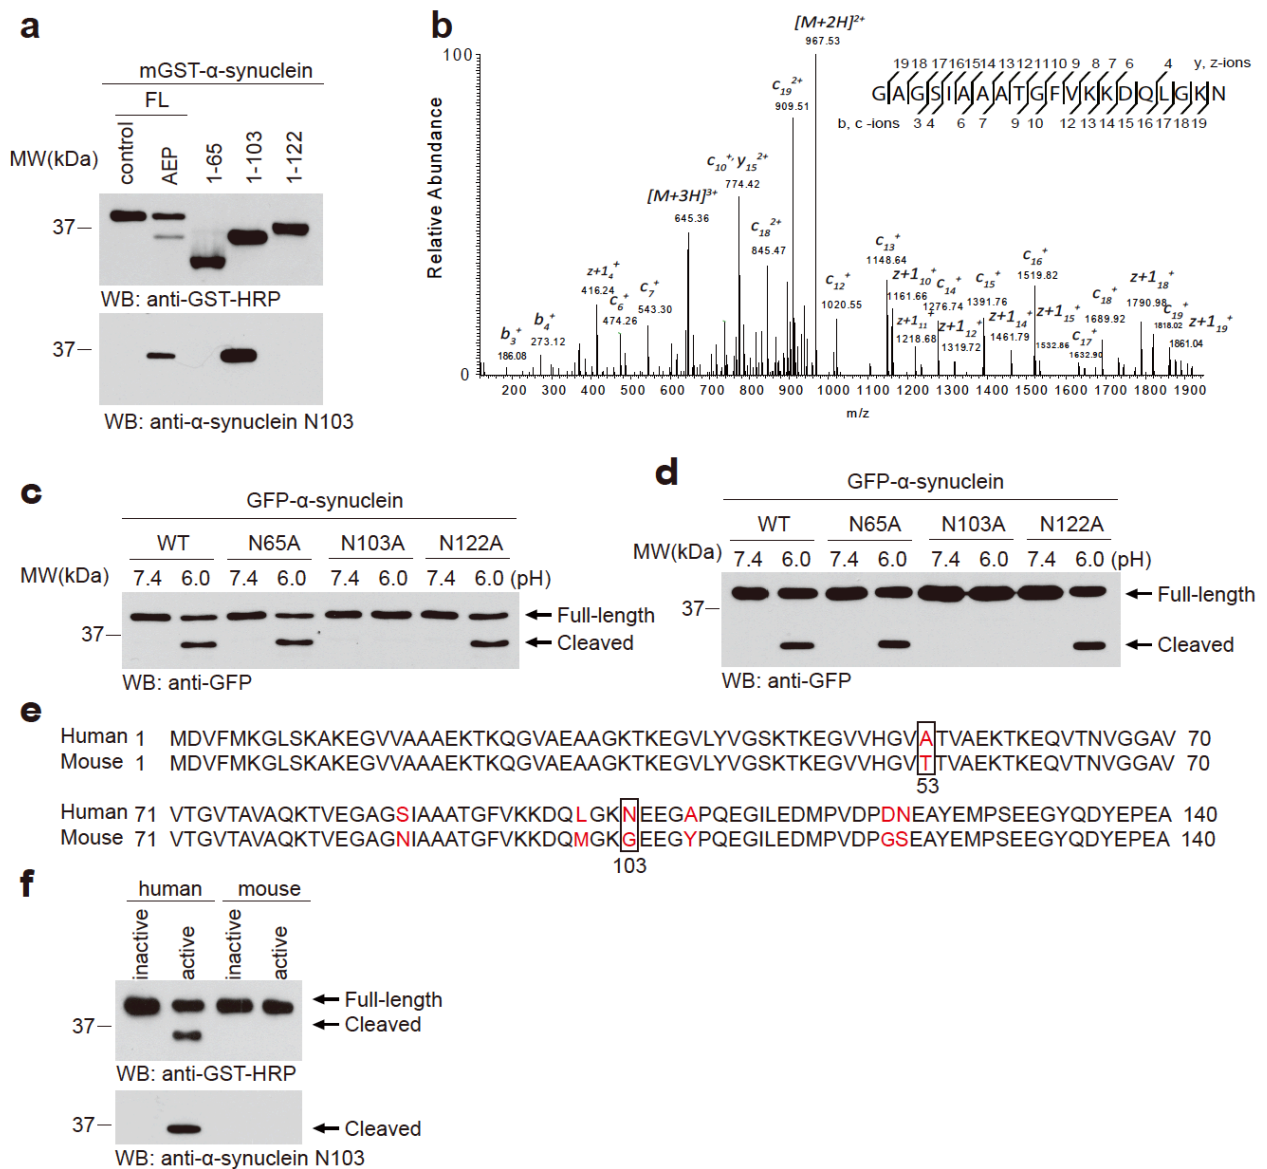

**Supplementary Figure 3.  $\alpha$ -synuclein is cleaved at N103 by AEP.** (a) Recombinant mammalian glutathione transferase (mGST)-tagged  $\alpha$ -synuclein was incubated with purified active AEP, and analyzed by immunoblotting. The AEP-derived  $\alpha$ -synuclein fragment shows the same molecular weight as a.a. 1-103 fragment. The AEP-derived  $\alpha$ -synuclein fragment was recognized by the anti- $\alpha$ -synuclein N103 antibody. (b) MS/MS spectrum showing that AEP cleaves  $\alpha$ -synuclein after N103 *in vitro*. The purified mGST- $\alpha$ -synuclein was incubated with active AEP for 30 min. The fragment was subject to MS/MS spectrum assay. (c-d) Cleavage of mutant N-terminal GFP-tagged  $\alpha$ -synuclein or C-terminal GFP-tagged  $\alpha$ -synuclein by AEP.  $\alpha$ -synuclein cleavage was analyzed by

Western blot after recombinant  $\alpha$ -synuclein wide-type, N65A, N103A, or N122A mutants were incubated with active mouse kidney lysates for 15 min. (e) Comparison of protein sequences of human and mouse  $\alpha$ -synuclein. (f) Cleavage of human and mouse  $\alpha$ -synuclein by recombinant AEP. The shown blots are the representative figures of three independent experiments.

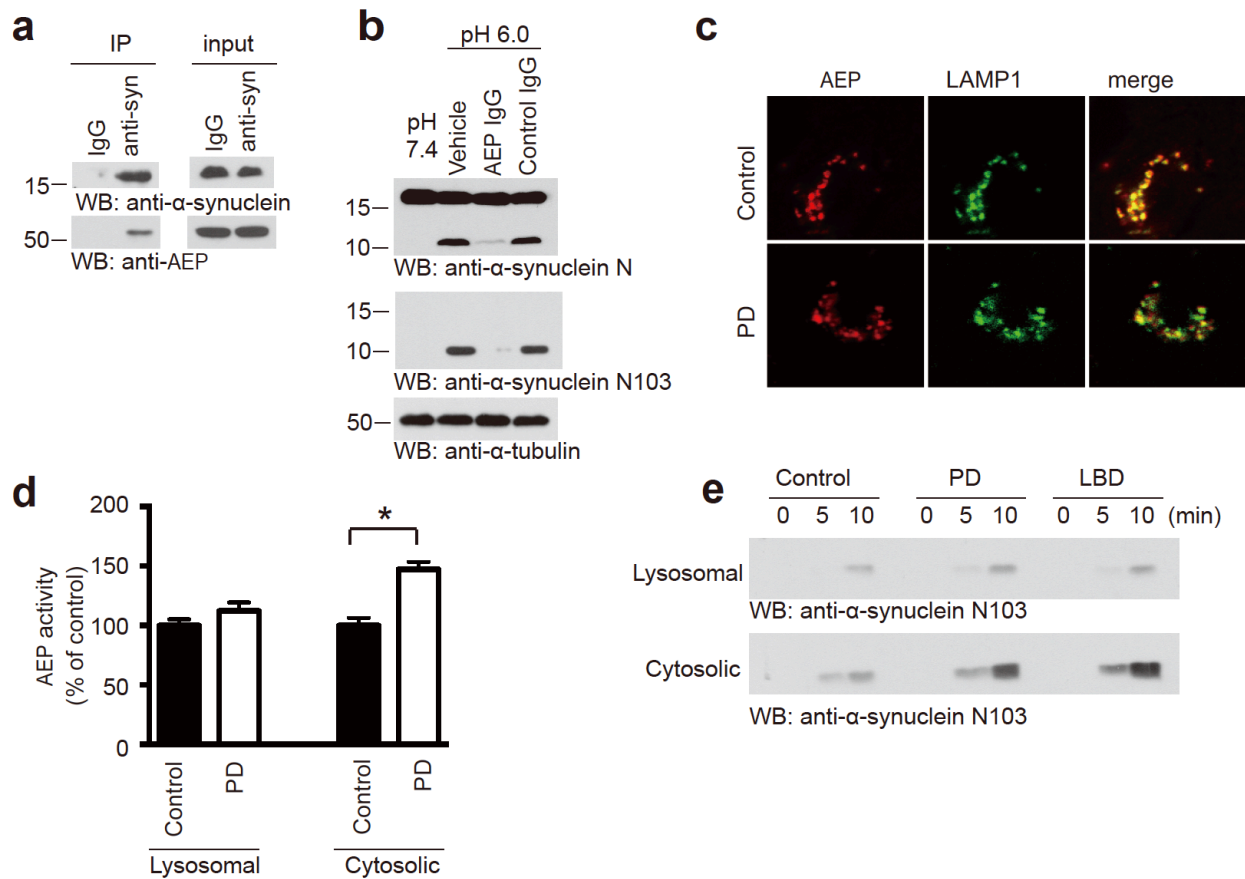

**Supplementary Figure 4. AEP interacts with  $\alpha$ -synuclein.** (a) Co-immunoprecipitation of  $\alpha$ -synuclein and AEP in PD brain samples.  $\alpha$ -synuclein was immunoprecipitated with anti- $\alpha$ -synuclein N-terminal antibody, and analyzed by immunoblotting with anti-AEP antibody. (b) Anti-AEP antibody abolishes the cleavage of  $\alpha$ -synuclein by AEP. Anti-AEP antibody or control IgG was added into human brain lysates and incubated at pH 6.0 for 15 min. The proteolytic processing of  $\alpha$ -synuclein was analyzed using Western blot. The shown blots are the representative figures of three independent experiments. Data represent mean  $\pm$  SEM of three experiments.  $n = 3$ , \* $P < 0.05$ , one-way ANOVA. (c) Immunostaining with lysosomal marker LAMP1 and  $\delta$ -secretase showing strict lysosomal localization of  $\delta$ -secretase in the control brain slides and diffuse staining of  $\delta$ -secretase in PD brain slides. (d)  $\delta$ -secretase activity in lysosomal and cytoplasmic fractions of control and PD brain samples. (mean  $\pm$  SEM;  $n = 3$ , \* $P < 0.05$ , one-way ANOVA) (e) Cleavage of recombinant  $\alpha$ -synuclein by lysosomal and cytoplasmic

fraction. Recombinant  $\alpha$ -synuclein was incubated in lysosomal and cytoplasmic fraction of human brain tissue at pH 6.0 for 0, 5 and 10 min. The production of  $\alpha$ -synuclein N103 fragment was analyzed using Western blot.



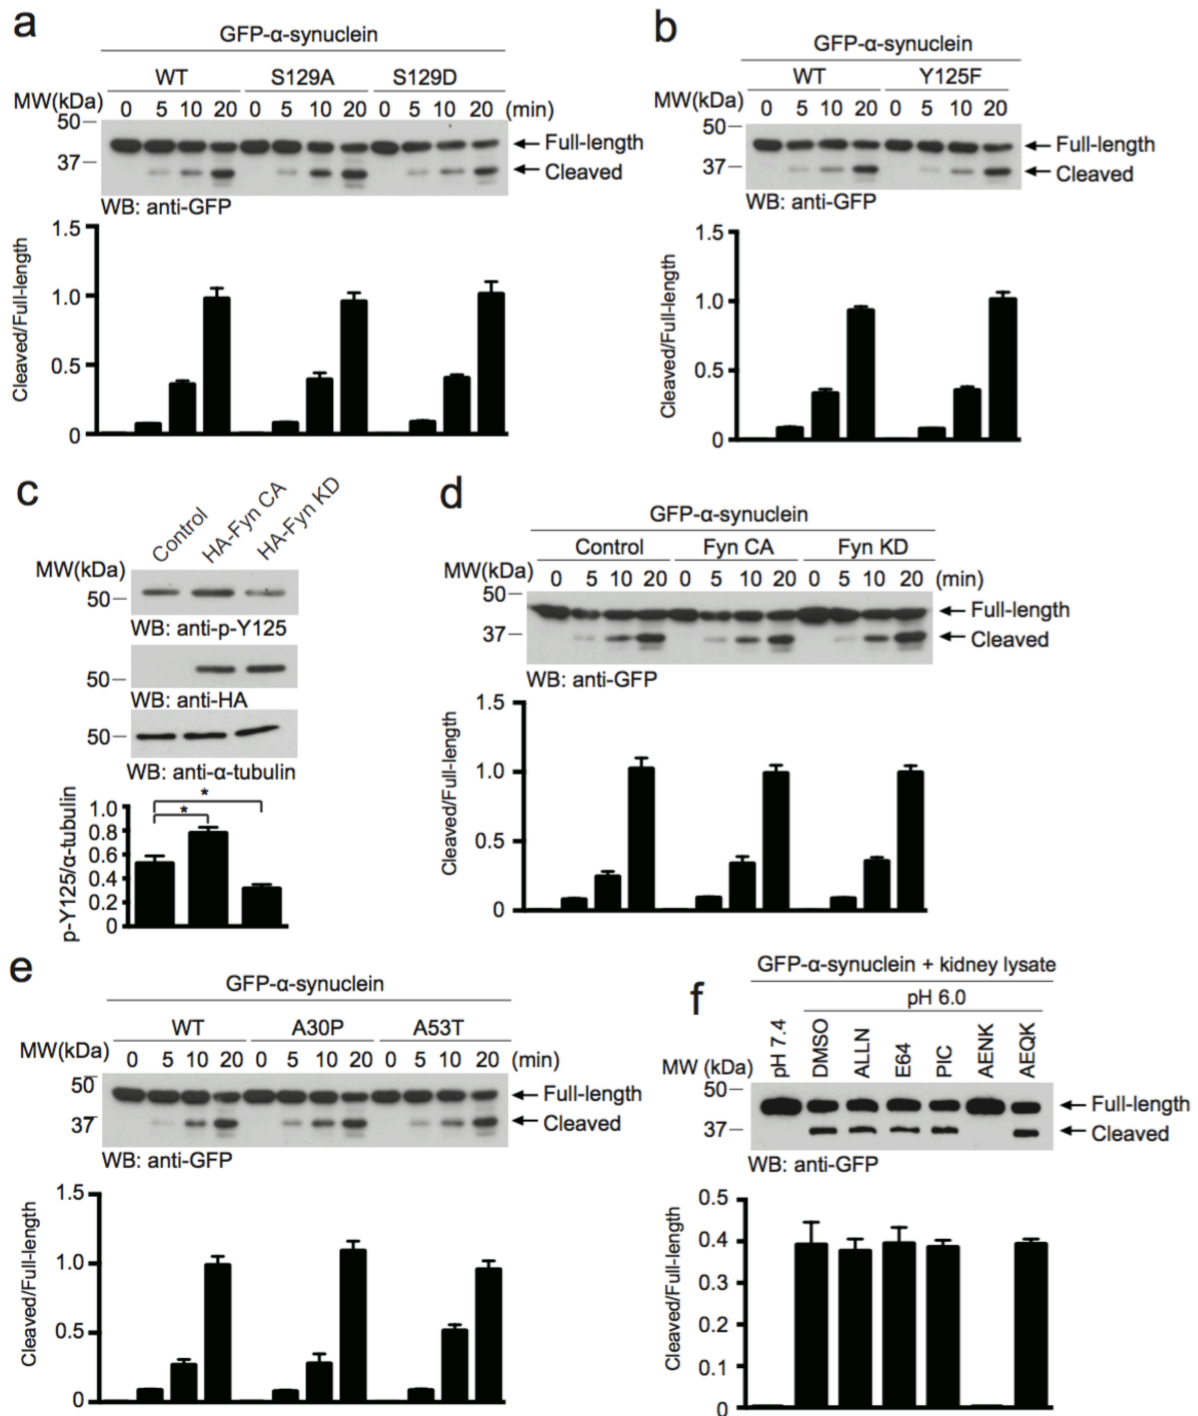

**Supplementary Figure 5. The cleavage of  $\alpha$ -synuclein by AEP is independent of its phosphorylation and mutations.** (a) Cleavage rate of  $\alpha$ -synuclein S129A and S129D mutations by AEP. HEK293 cells were transfected with GFP- $\alpha$ -synuclein wild-type, S129A, and S129D mutations of  $\alpha$ -synuclein, and incubated with active kidney lysates for 0, 5, 10, or 20 min at pH 6.0, and analyzed by immunoblotting. (b) Cleavage rate of  $\alpha$ -synuclein Y125F mutation by AEP. (c)

Overexpression of constitutively active Fyn induced the phosphorylation of  $\alpha$ -synuclein at Y125. (d) Cleavage assay indicates that constitutively active (CA) Fyn or kinase dead (KD) Fyn does not affect the cleavage rate of  $\alpha$ -synuclein. (e) A30P and A53T mutant  $\alpha$ -synuclein were cleaved by AEP at a similar rate as wild-type (WT)  $\alpha$ -synuclein. (f) Cleavage of  $\alpha$ -synuclein by AEP was not blocked by calpain, cathepsin or protease inhibitor cocktail. HEK293 cells were transfected with GFP- $\alpha$ -synuclein. The cell lysates were incubated with active kidney lysates at 37°C for 10 min in the presence of calpain inhibitor ALLN, cathepsin inhibitor E64, protease inhibitor cocktail, or AEP inhibitor AENK.  $\alpha$ -synuclein cleavage was analyzed by Western blot. Only AEP inhibitory peptide AENK but not any other small molecular inhibitors antagonized  $\alpha$ -synuclein cleavage by AEP. The shown blots are the representative figures of three independent experiments. The shown blots are the representative figures of three independent experiments. Data represent mean  $\pm$  SEM of three experiments. \* $P < 0.05$ , one-way ANOVA.

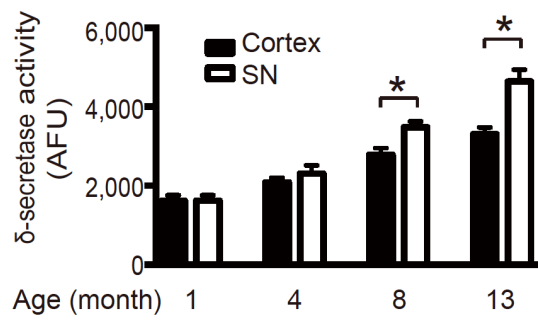

**Supplementary Figure 6. AEP activity assay in wild-type mice.** AEP activity is escalated in the cortex and SN tissues of wild-type mice in an age-dependent style (mean  $\pm$  SEM;  $n = 6$ ,  $*P < 0.05$ , one-way ANOVA). AFU, arbitrary fluorescence units.

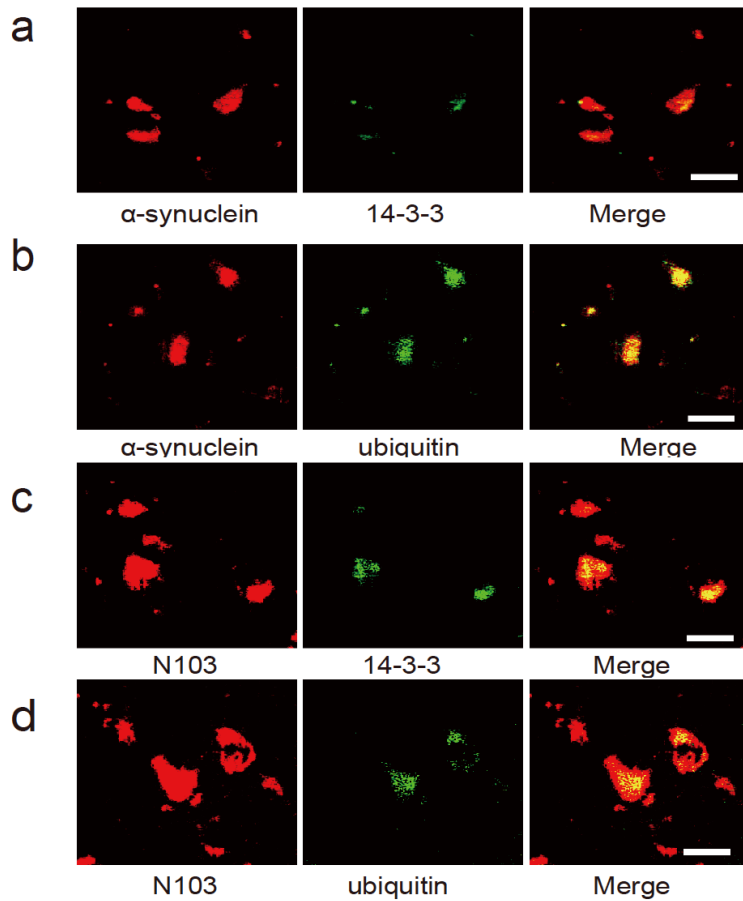

**Supplementary Figure 7. Expression of  $\alpha$ -synuclein full-length or 1-103 fragments induces intraneuronal inclusions containing ubiquitin and 14-3-3.** Brain slides injected with AAVs encoding  $\alpha$ -synuclein full-length (a, b) or 1-103 (c, d) were immunostained with  $\alpha$ -synuclein antibody (a, b), anti- $\alpha$ -synuclein N103 antibody (c, d), 14-3-3 antibody (a, c) and ubiquitin antibody (b, d).

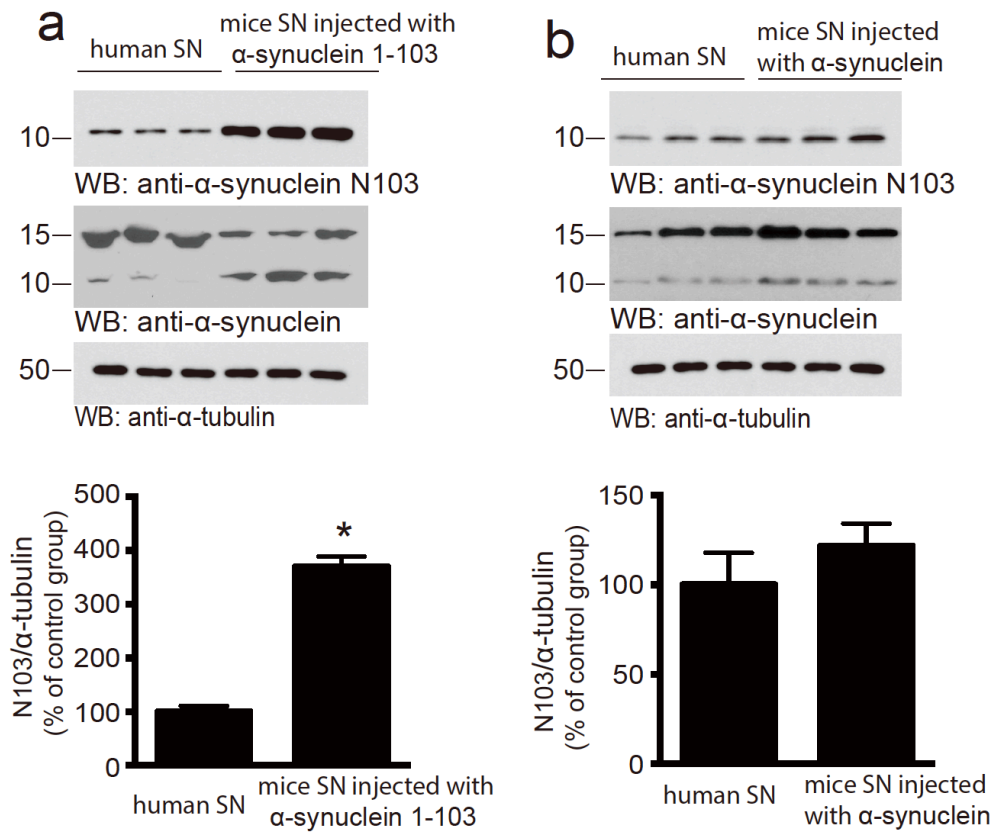

**Supplementary Figure 8. Expression level of N103 fragments.** Western blot shows the expression level of  $\alpha$ -synuclein 1-103 fragments in SN tissues from PD patients, mice SN tissue injected with human  $\alpha$ -synuclein virus, and mice SN tissue injected with  $\alpha$ -synuclein 1-103 fragment virus (mean  $\pm$  SEM;  $n = 3$ ,  $*P < 0.05$ , student's  $t$ -test).
